# Supplementary material
Source: publisher figshare collection journal article supplement (https://acs.figshare.com/ndownloader/files/3780781)
Supplement: Supplementary file 1 [file 3780781]

Supporting Information-3:

**Antiviral New Limonoids Including Khayanolides from the Trang Mangrove Plant, *Xylocarpus moluccensis***

Wanshan Li,<sup>†,||</sup> Zhongping Jiang,<sup>‡</sup> Li Shen,<sup>\*,‡</sup> Patchara Pedpradab,<sup>§</sup> Torsten

Bruhn,<sup>⊥</sup> Jun Wu,<sup>\*,‡</sup> and Gerhard Bringmann<sup>\*,⊥</sup>

<sup>†</sup>South China Sea Institute of Oceanology, Chinese Academy of Sciences, 164 West Xingang Road, Guangzhou 510301, People's Republic of China

<sup>‡</sup>Marine Drugs Research Center, College of Pharmacy, Jinan University, 601 Huangpu Avenue West, Guangzhou 510632, People's Republic of China

<sup>§</sup>Department of Marine Sciences, Faculty of Sciences and Fishery Technology, Rajamangala University of Technology Srivijaya, Trang Campus, Sikao District, Trang Province 92150, Thailand

<sup>⊥</sup>Institute of Organic Chemistry, University of Würzburg, Am Hubland, Würzburg 97074, Germany

<sup>||</sup>University of Chinese Academy of Sciences, 19 Yuquan Road, Beijing 100049, People's Republic of China

Copies of CD spectra for compounds **2-12**, and quantum-chemical electronic circular dichroism (ECD) calculations for compounds **3, 4, 6, 11, and 12**.

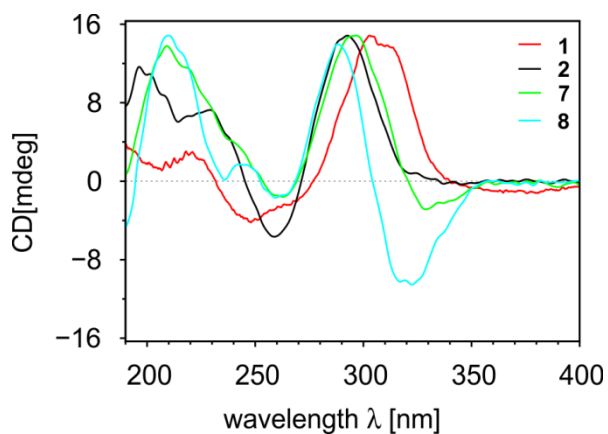

**Figure S1.** Comparison of the experimental CD spectra of **1**, **2**, **7**, and **8**, due to the similarity of these curves all compounds do have the *R*-configuration at the stereocenters C-13 and C-17.

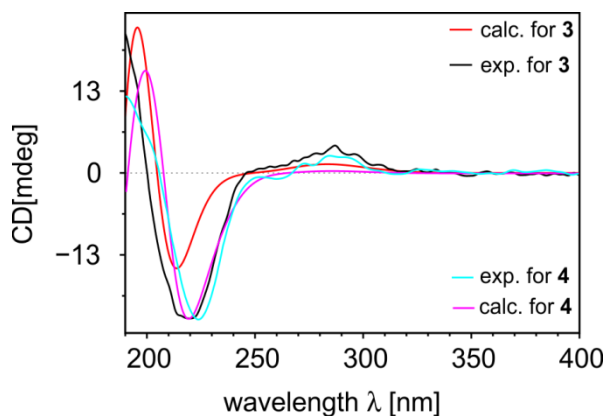

**Figure S2.** Comparison of the experimental and calculated (both of the 1*R*,2*R*,4*R*,5*R*,9*R*,10*R*,13*R*,17*R*,30*R* configuration) CD spectra of **3** and **4**.

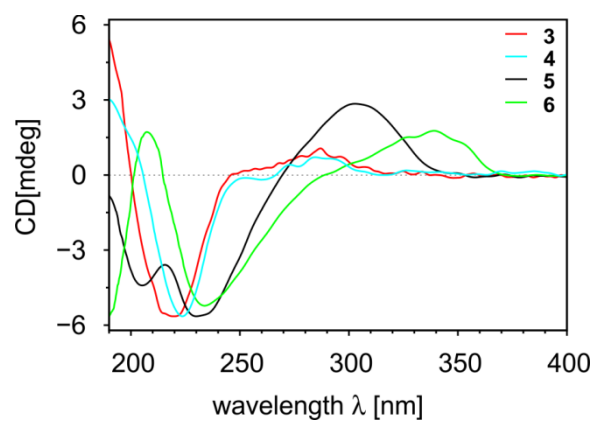

**Figure S3.** Comparison of the experimental CD spectra of **3**, **4**, **5**, and **6**, due to the similarity of these curves all compounds do have the same configuration at the stereocenters C-13 and C-17.

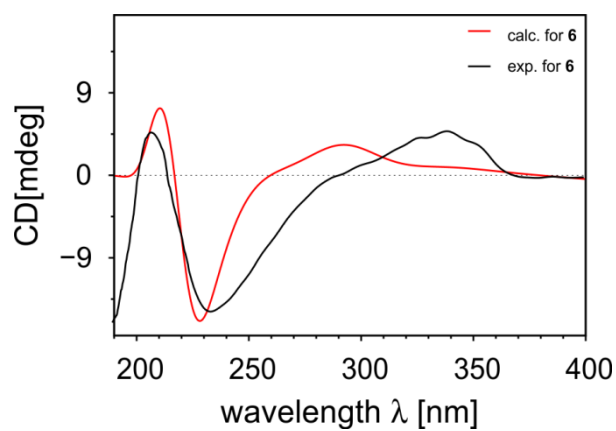

**Figure S4.** Comparison of the experimental CD spectra of **6** with that calculated for the 1*R*,3*S*,4*R*,5*S*,9*R*,10*S*,13*R*,17*R*,30*S*-configured **6**.

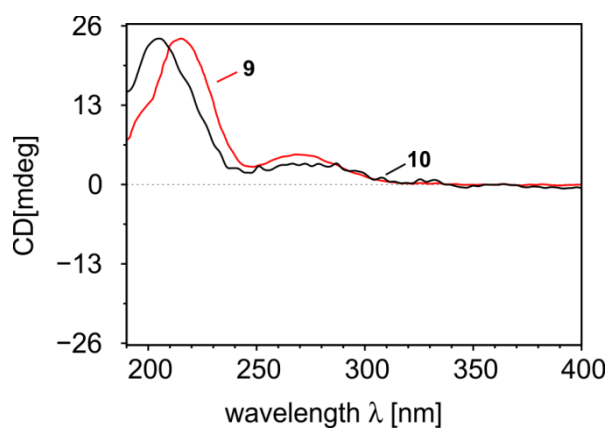

**Figure S5.** Comparison of the experimental CD spectra of **9** and **10**, due to the similarity of these curves the compounds do have the same configuration. In addition they are nearly identical with the CD curve of the known compound andirolide G.

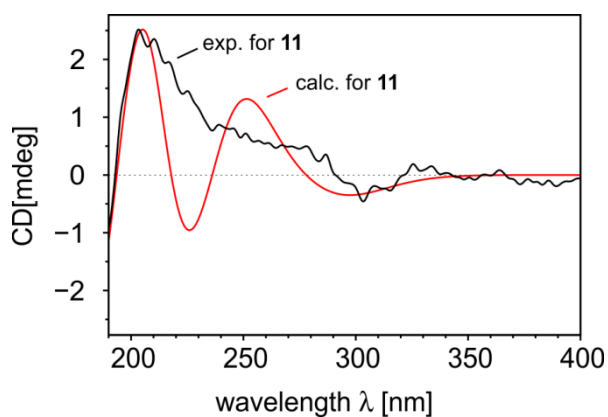

**Figure S6.** Comparison of the experimental CD spectra of **11** with the spectrum calculated of *2R,5S,9S,10R,13R,17R*-**11**. The *R*-configuration at C-6 was arbitrarily chosen but has no influence to the CD and was thus not elucidated.

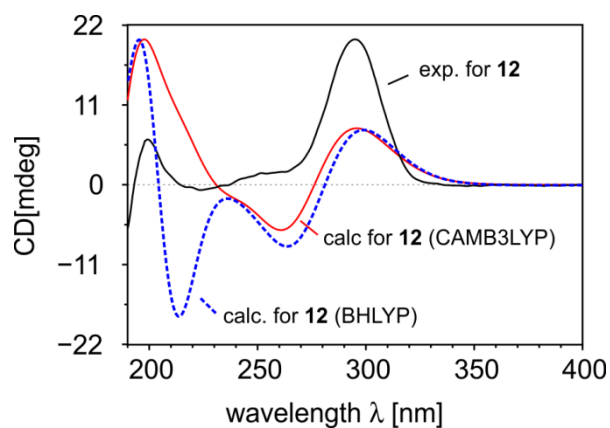

**Figure S7.** Comparison of the experimental CD spectra of **12** with the spectrum calculated for *2R,5S,9S,10R,13R,17R*-**12**. The stereocenter at C-6 was arbitrarily set to an *R*-configuration it has no influence on the CD spectrum and was thus not elucidated. In this case two different methods were used: TDBHLYP/def2-SVP and TDCAM-B3LYP/def2-TZVP(-f).

## UPLC-MS analysis of thaixylomolin I (**3**) maintained in EtOH

In the experiment, 1.0 mg of compound **3** was dissolved and maintained in 1.0 mL EtOH at room temperature for a week. Then, UPLC-MS analysis was performed on an RP-18 column (ACQUITY UPLC BEH, 100 × 2.1 mm i.d., 1.7  $\mu$ m, Waters) and eluted with 40% MeCN in water. In **Figure S10**, except for the peak of compound **3** ( $t_R$  = 3.6 min with a molecular weight of 542), the only new produced small peak at  $t_R$  = 5.5 min can be found. Its molecular weight is 568. At the moment, we do not know the genuine structure of this peak. But, undoubtedly, it was not compound **4**, which should appear at  $t_R$  = 7.4 min and have a molecular weight of 570 (Please see **Figure S9**).

## Display Report

### Analysis Info

Analysis Name C:\Users\john\Desktop\1\lws-3-45%MeCN\_1-B,2\_01\_180.d  
 Method 180.m  
 Sample Name lws-3-45%MeCN  
 Comment

Acquisition Date 2015/3/29 18:09:15

Operator bdal  
 Instrument amaZon SL

### Acquisition Parameter

|                   |          |              |           |                          |          |
|-------------------|----------|--------------|-----------|--------------------------|----------|
| Ion Source Type   | ESI      | Ion Polarity | Positive  | Alternating Ion Polarity | on       |
| Mass Range Mode   | Enhanced | Scan Begin   | 50 m/z    | Scan End                 | 1000 m/z |
| Capillary Exit    | 1395 a/s | n/a          | n/a       | Trap Drive               | 64.4     |
| Accumulation Time |          | Averages     | 2 Spectra | Auto MS/MS               | off      |

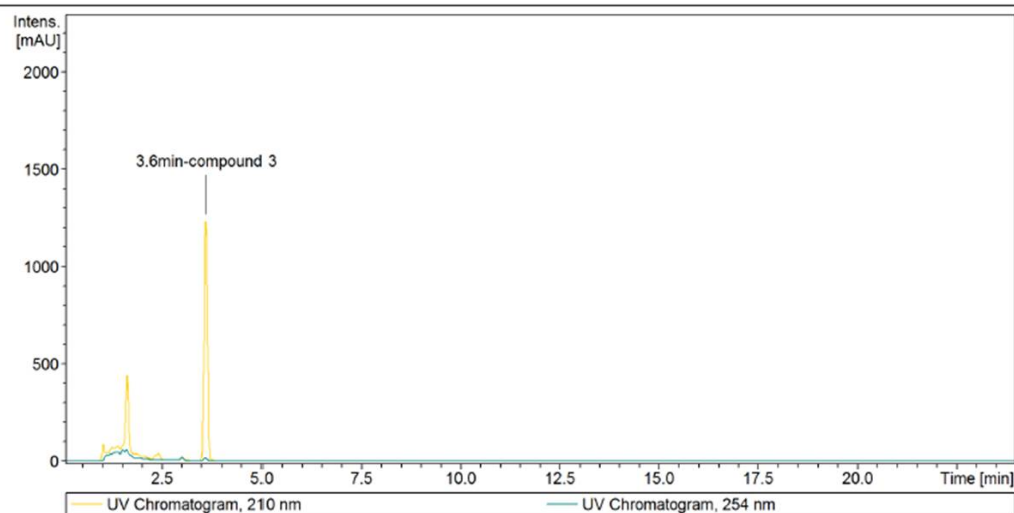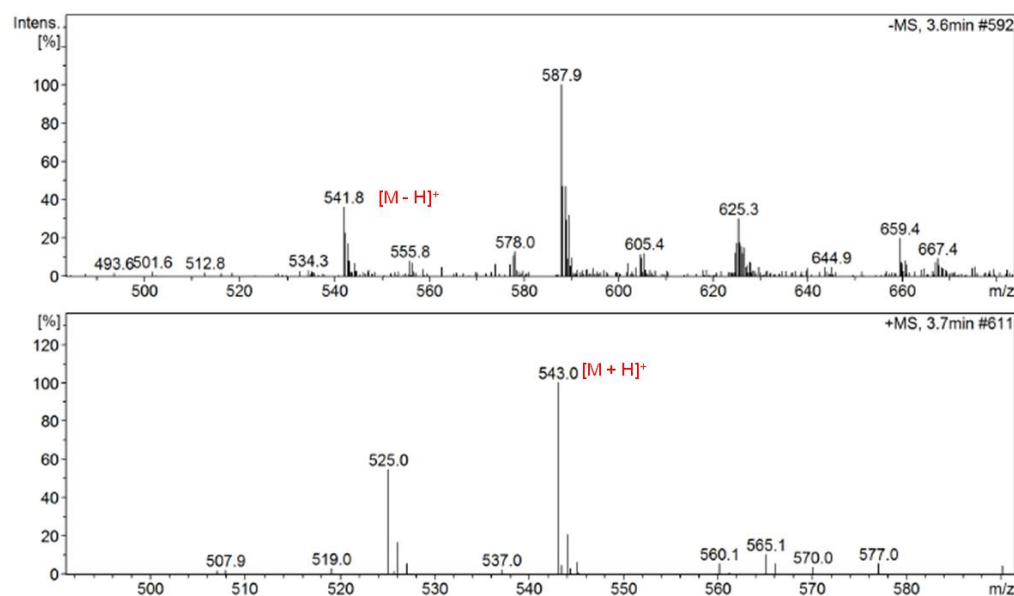

**Figure S8.** UPLC-MS analysis of thaixylomolin I (**3**)

## Display Report

### Analysis Info

Analysis Name D:\Data\liwanshan\no-lws-24\_1-B,1\_01\_177.d  
 Method 177.m  
 Sample Name no-lws-24  
 Comment

Acquisition Date 3/29/2015 3:40:04 PM

Operator bdal  
 Instrument amaZon SL

### Acquisition Parameter

|                   |                     |              |           |                          |          |
|-------------------|---------------------|--------------|-----------|--------------------------|----------|
| Ion Source Type   | ESI                 | Ion Polarity | Negative  | Alternating Ion Polarity | on       |
| Mass Range Mode   | Enhanced Resolution | Scan Begin   | 50 m/z    | Scan End                 | 1000 m/z |
| Accumulation Time | 7479 $\mu$ s        | RF Level     | 77 %      | Trap Drive               | 58.8     |
| SPS Target Mass   | 600 m/z             | Averages     | 2 Spectra | Auto MS/MS               | off      |

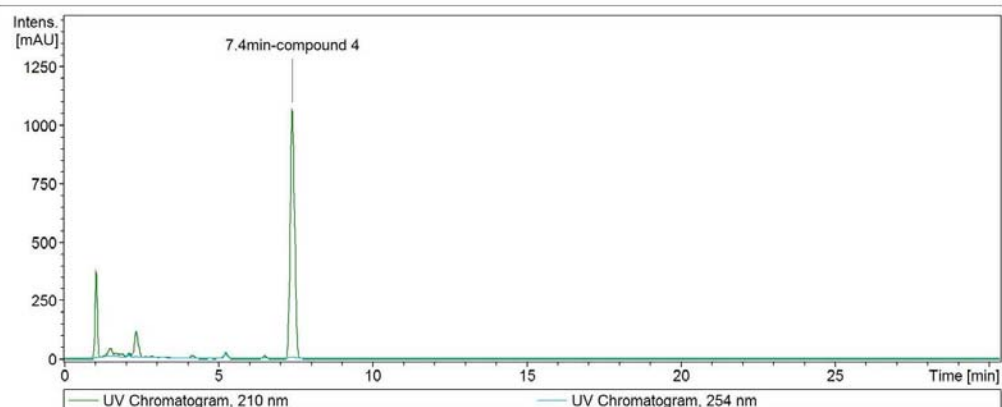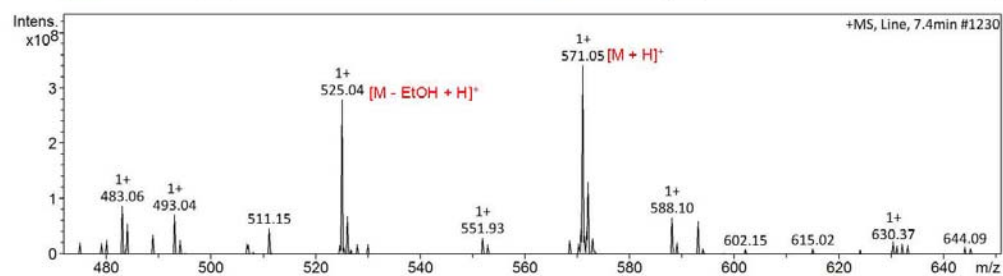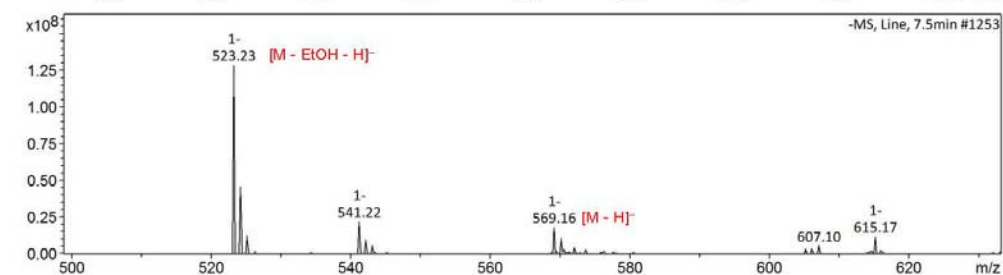

**Figure S9.** UPLC-MS analysis of thaixylomolin J (4)



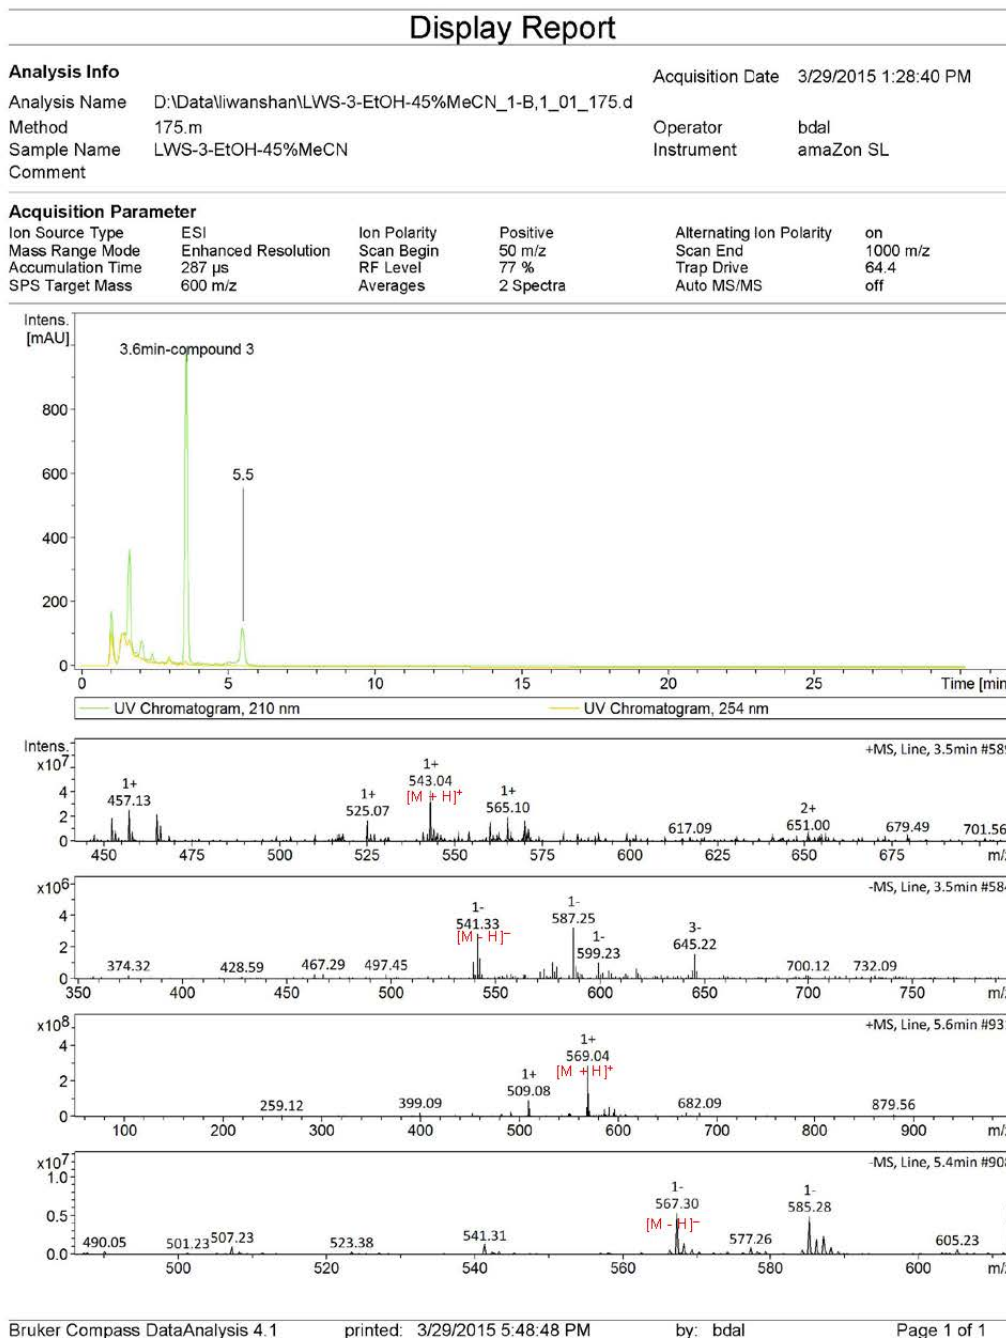

**Figure S10.** UPLC-MS analysis of thaixylomolin I (**3**) maintained in EtOH (1.0 mg of thaixylomolin I (**3**) was dissolved and maintained in 1.0 mL EtOH at room temperature for a week)
